# Supplementary material for: Liquid crystalline octaalkoxycarbonyl phthalocyanines: design, synthesis, electronic structure, self-aggregation and mesomorphism
Source: Royal Society of Chemistry journal article supplement (doi:10.1039/b617856a), 2007-01-01
Supplement: b617856a.pdf [file b617856a.pdf]

## Electronic Supplementary Information (ESI)

*Journal of Materials Chemistry*

### Liquid Crystalline Octaalkoxycarbonyl Phthalocyanines: Design, Synthesis, Electronic Structure, Self-aggregation and Mesomorphism

Sergey Sergeyev,<sup>a</sup> Eric Pouzet,<sup>a</sup> Olivier Debever,<sup>a</sup> Jeremy Levin,<sup>a</sup> Johannes Gierschner,<sup>b</sup> Jérôme Cornil,<sup>b</sup> Rafael Gómez Aspe<sup>c</sup> and Yves Henri Geerts\*<sup>a</sup>

#### Synthesis and characterization of **1a,b,d,e**, **2**, **3**

##### **2,3,9,10,16,17,23,24-Octakis(octyl-1-oxycarbonyl)-(29H, 31H)-phthalocyanine (1a).**

Prepared similarly to **1c** from **3** (200 mg, 0.23 mmol) and 1-octanol (**4a**) (4 mmol, 0.63 cm<sup>3</sup>) with the following amendment: flash chromatography (SiO<sub>2</sub>, CH<sub>2</sub>Cl<sub>2</sub>/AcOEt 20 : 1) provided analytically pure product and further purification was not necessary. Green solid. Yield 260 mg (64%).  $\lambda_{\max}$  (CHCl<sub>3</sub>)/nm 350 ( $\epsilon/\text{dm}^3 \text{ mol}^{-1} \text{ cm}^{-1}$  85 600), 648 (55 700), 668 (172 000), 705 (179 000);  $\delta_{\text{H}}$  (300 MHz, 0.01 mol dm<sup>-3</sup> in CDCl<sub>3</sub>, Me<sub>4</sub>Si, 25 °C) 9.67 (8 H, s, arom. H), 4.67 (16 H, t, *J* 7.0, CH<sub>2</sub>O), 2.03 (16H, quint, *J* 7.0, CH<sub>2</sub>CH<sub>2</sub>O), 1.30–1.70 (80 H, m, CH<sub>2</sub>), 0.91 (24 H, t, *J* 6.9, Me), –1.20 (2 H, br s, NH);  $\delta_{\text{C}}$  (75 MHz, 0.01 mol dm<sup>-3</sup> in CDCl<sub>3</sub>, Me<sub>4</sub>Si, 25 °C) 167.6, 137.4, 134.5, 124.7, 66.7, 31.9, 29.4, 29.3, 28.8, 26.1, 22.7, 14.1; *m/z* (MALDI) 1763.1 (M<sup>+</sup>).

##### **2,3,9,10,16,17,23,24-Octakis(dodecyl-1-oxycarbonyl)-(29H, 31H)-phthalocyanine (1b).**

Prepared similarly to **1c** from **3** (433 mg, 0.5 mmol) and 1-dodecanol (**4b**) (10 mmol, 1.86 g) with the following amendment: the crude product was isolated by flash chromatography (SiO<sub>2</sub>, CH<sub>2</sub>Cl<sub>2</sub>/AcOEt 50 : 1). Then it was dissolved in hexane (50 cm<sup>3</sup>), and MeOH was added until precipitation of **1b** was complete and the supernatant was nearly colorless. The supernatant was decanted, the residue re-dissolved in hexane and the precipitation with MeOH was repeated three times to give analytically pure **1b** after drying *in vacuo* as a green solid. Yield 664 mg (60 %).  $\lambda_{\max}$  (CHCl<sub>3</sub>)/nm 350 ( $\epsilon/\text{dm}^3 \text{ mol}^{-1} \text{ cm}^{-1}$  93 400), 649 (55 600), 668 (170 000), 705 (188 000);  $\delta_{\text{H}}$  (300 MHz, 0.01 mol dm<sup>-3</sup> in CDCl<sub>3</sub>, Me<sub>4</sub>Si, 25 °C) 9.58 (8 H, s, arom. H), 4.66 (16 H, t, *J* 7.3, CH<sub>2</sub>O), 2.04 (16 H, quint, *J* 7.3, OCH<sub>2</sub>CH<sub>2</sub>), 1.20–1.67 (144 H, m, CH<sub>2</sub>), 0.84 (24 H, t, *J* 7.0, Me), –1.65 (2 H, br s, NH);  $\delta_{\text{C}}$  (75 MHz, 0.01 mol dm<sup>-3</sup> in CDCl<sub>3</sub>, Me<sub>4</sub>Si, 25 °C) 167.5, 137.1, 134.5, 124.3, 66.7, 31.9, 29.8, 29.7, 29.7, 29.5, 29.4, 26.2, 22.7, 14.1 (2 signals of CH<sub>2</sub> missing due to overlap); *m/z* (MALDI) 2211.6 (M<sup>+</sup>).

**2,3,9,10,16,17,23,24-Octakis(2-hexyldecyl-1-oxycarbonyl)-(29H, 31H)-phthalocyanine (1d).**

Prepared similarly to **1c** from **3** (433 mg, 0.5 mmol) and 2-hexyl-1-decanol (**4d**) (10 mmol, 2.90 cm<sup>3</sup>) with the following amendment: the crude product was isolated by flash chromatography with CH<sub>2</sub>Cl<sub>2</sub>. The crude product was applied on the SiO<sub>2</sub> column, excess of **4d** was eluted with MeOH, and then **1d** was eluted with CH<sub>2</sub>Cl<sub>2</sub>. Viscous green oil. Yield 838 mg (63 %).

$\lambda_{\max}$  (CHCl<sub>3</sub>)/nm 350 ( $\epsilon/\text{dm}^3 \text{ mol}^{-1} \text{ cm}^{-1}$  97 700), 649 (55 900), 668 (175 000), 705 (194 000);  $\delta_{\text{H}}$  (300 MHz, 0.01 mol dm<sup>-3</sup> in CDCl<sub>3</sub>, Me<sub>4</sub>Si, 25 °C) 9.88 (8 H, s, arom. H), 4.52 (16 H, d, *J* 6.2, CH<sub>2</sub>O), 2.02 (8 H, m, CHCH<sub>2</sub>O), 1.17–1.65 (192 H, m, CH<sub>2</sub>), 1.00 (24 H, t, *J* 7.0, Me), 0.87 (24 H, t, *J* 6.9, Me), –0.17 (2 H, br s, NH).  $\delta_{\text{C}}$  (75 MHz, 0.01 mol dm<sup>-3</sup> in CDCl<sub>3</sub>, Me<sub>4</sub>Si, 25 °C) 167.8, 137.9, 134.7, 124.6, 69.6, 37.5, 31.9, 31.4, 30.1, 29.8, 29.7, 29.4, 26.8, 26.8, 22.7, 22.6, 14.1, 14.0 (2 signals of CH<sub>2</sub> missing due to overlap); *m/z* (MALDI) 2660.0 (M<sup>+</sup>).

**2,3,9,10,16,17,23,24-Octakis(2-octyl-dodecyl-1-oxycarbonyl)-(29H, 31H)-phthalocyanine (1e).**

Prepared similarly to **1d** from **3** (200 mg, 0.23 mmol) and 2-octyl-1-dodecanol (**4e**) (1.44 cm<sup>3</sup>, 4 mmol). Viscous green oil. Yield 407 mg (57%).

$\lambda_{\max}$  (CHCl<sub>3</sub>)/nm 350 ( $\epsilon/\text{dm}^3 \text{ mol}^{-1} \text{ cm}^{-1}$  95 900), 649 (55 000), 668 (172 000), 705 (189 000);  $\delta_{\text{H}}$  (300 MHz, 0.01 mol dm<sup>-3</sup> in CDCl<sub>3</sub>, Me<sub>4</sub>Si, 25 °C) 9.88 (8 H, s, arom. H), 4.51 (16 H, d, *J* 6.0, CH<sub>2</sub>O), 2.02 (8 H, m, CHCH<sub>2</sub>O), 1.10–1.65 (256 H, m, CH<sub>2</sub>), 0.79 (24 H, t, *J* 6.2), 0.75 (24 H, t, *J* 6.8), –0.17 (br s, 2H);  $\delta_{\text{C}}$  (75 MHz, 0.01 mol dm<sup>-3</sup> in CDCl<sub>3</sub>, Me<sub>4</sub>Si, 25 °C) 167.8, 137.9, 134.7, 124.6, 69.6, 37.5, 31.9, 31.8, 31.4, 30.1, 29.8, 29.7, 29.7, 29.4, 29.3, 26.8, 22.7, 22.6, 14.1, 14.0 (4 signals of CH<sub>2</sub> missing due to overlap); *m/z* (MALDI) 3108.7 (M<sup>+</sup>).

**2,3,9,10,16,17,23,24-Octacyano-(29H, 31H)-phthalocyanine (2).**

Solid state NMR:  $\delta_{\text{C}}$  (75 MHz, 25 °C) 140.6 (C=N), 137.5, 126.4 (CH), 117.3, 111.3 (CN); *m/z* (FD in the presence of CuCl<sub>2</sub>): found: *m/z* 775.04 (M<sup>+</sup>); C<sub>40</sub>H<sub>8</sub>CuN<sub>16</sub> requires 775.05.

**2,3,9,10,16,17,23,24-Octacarboxy-(29H, 31H)-phthalocyanine (3).**

$\delta_C$  (75 MHz, NaOD/D<sub>2</sub>O, 25 °C, Me<sub>3</sub>SiCH<sub>2</sub>CH<sub>2</sub>COONa as internal standard) 177.9 (COOH), 157.2, 139.1, 138.8, 120.8.  $m/z$  (MALDI) 866 (M<sup>+</sup>, 100), 848 ([M – H<sub>2</sub>O]<sup>+</sup>, 48), 823 ([M – CO<sub>2</sub> + H]<sup>+</sup>, 43).

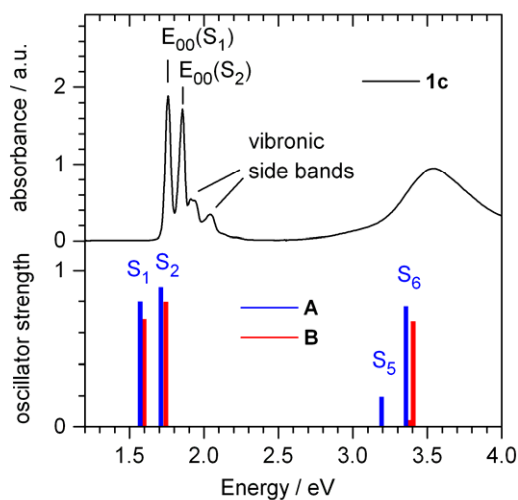

**Fig. S1.** Absorption spectra of phthalocyanines. Top: experimental spectrum of **1c** in CHCl<sub>3</sub>; E<sub>00</sub>(S<sub>1</sub>) and E<sub>00</sub>(S<sub>2</sub>) are the adiabatic transition energies of the lowest electronic states; the vibronic side bands of S<sub>1</sub> (ca. 1.94 eV) and of S<sub>2</sub> (ca. 2.04 eV) are indicated. Bottom: Calculated stick spectra of the vertical electronic transition energies of **A** (blue) and **B** (red); geometry optimization: DFT B3LYP/6-31G\*; electronic structure: ZINDO/S.

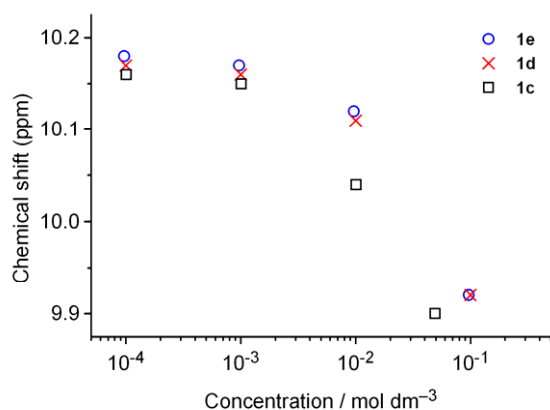

**Fig. S2.** Concentration-dependent <sup>1</sup>H chemical shifts of aromatic protons in **1c**, **1d** and **1e** recorded at 25 °C in C<sub>6</sub>D<sub>6</sub>.

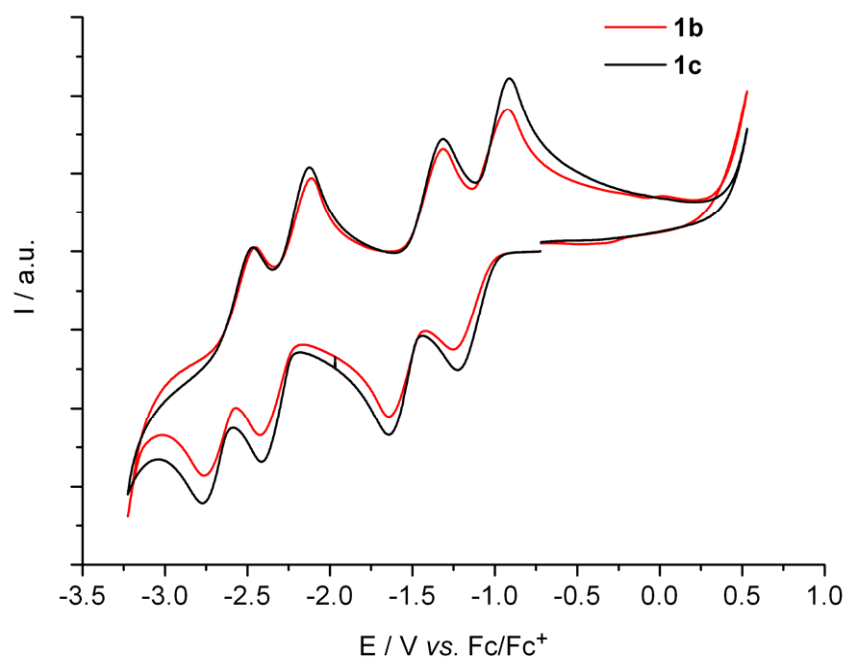

**Fig. S3.** CV curves of **1b** (red) and **1c** (black) in THF ( $10^{-3}$  mol dm<sup>-3</sup>) containing TBAPF<sub>6</sub> ( $0.1$  mol dm<sup>-3</sup>); 25 °C, scan rate 100 mV s<sup>-1</sup>; potentials vs. Fc/Fc<sup>+</sup>.

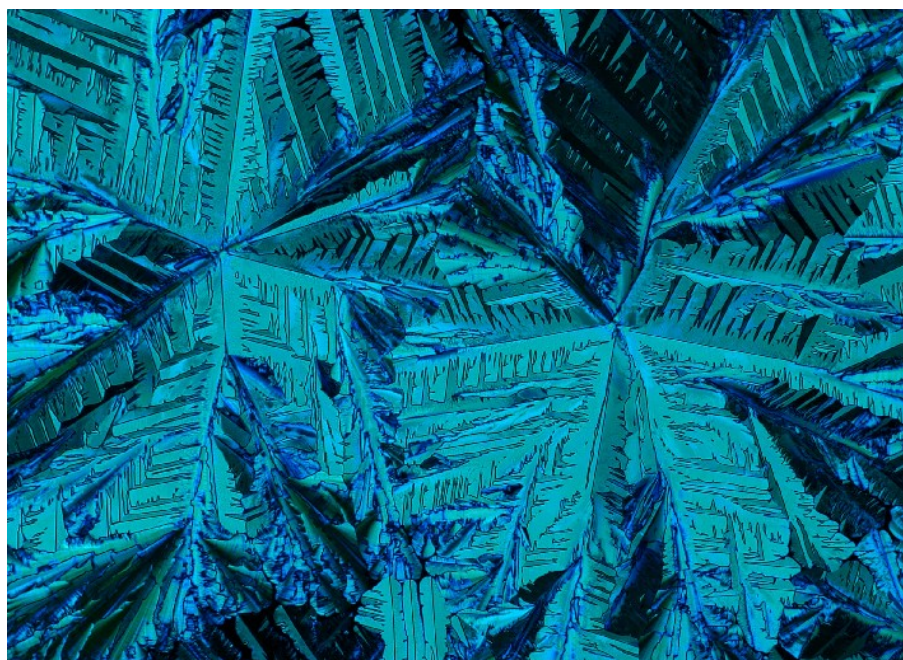

**Fig. S4.** Cross-polarized optical microscopy image of **1c** after cooling from isotropic liquid (160 °C) to columnar mesophase (140°C).

**Table S1.** Detailed indexation of liquid crystalline phase of **1c** at different temperatures.<sup>a</sup>

| <b>1c</b>                       | <i>h</i> | <i>k</i> | <i>l</i> | <i>d</i> <sub>calc</sub> (Å) | <i>d</i> <sub>exp</sub> (Å)                | Lattice parameters <sup>a</sup>  |
|---------------------------------|----------|----------|----------|------------------------------|--------------------------------------------|----------------------------------|
| <b>Col<sub>r</sub></b> at 25°C  | 1        | 1        |          | 23.7                         | 23.7                                       | <i>a</i> = 40.3 Å                |
|                                 | 2        | 0        |          | 20.1                         | 20.2                                       | <i>b</i> = 29.4 Å                |
|                                 | 1        | 3        |          | 9.5                          | 9.5                                        | <i>γ</i> = 90.0°                 |
|                                 | 0        | 0        | 1        |                              | 4.5 (broad halo)<br>No apparent reflection | <i>S</i> = 1184.8 Å <sup>2</sup> |
| <b>Col<sub>r</sub></b> at 50°C  | 1        | 1        |          | 23.7                         | 23.7                                       | <i>a</i> = 40.2 Å                |
|                                 | 2        | 0        |          | 20.1                         | 20.1                                       | <i>b</i> = 29.3 Å                |
|                                 | 1        | 3        |          | 9.5                          | 9.5                                        | <i>γ</i> = 90.0°                 |
|                                 | 0        | 0        | 1        |                              | 4.5 (broad halo)<br>No apparent reflection | <i>S</i> = 1177.9 Å <sup>2</sup> |
| <b>Col<sub>r</sub></b> at 100°C | 1        | 1        |          | 23.6                         | 23.6                                       | <i>a</i> = 39.8 Å                |
|                                 | 2        | 0        |          | 19.9                         | 19.9                                       | <i>b</i> = 29.3 Å                |
|                                 | 1        | 3        |          | 9.5                          | 9.5                                        | <i>γ</i> = 90.0°                 |
|                                 | 0        | 0        | 1        |                              | 4.6 (broad halo)<br>No apparent reflection | <i>S</i> = 1166.1 Å <sup>2</sup> |
| <b>Col<sub>r</sub></b> at 140°C | 1        | 1        |          | 23.5                         | 23.5                                       | <i>a</i> = 39.6 Å                |
|                                 | 2        | 0        |          | 19.8                         | 19.8                                       | <i>b</i> = 29.2 Å                |
|                                 | 1        | 3        |          | 9.4                          | 9.4                                        | <i>γ</i> = 90.0°                 |
|                                 | 0        | 0        | 1        |                              | 4.6 (broad halo)<br>No apparent reflection | <i>S</i> = 1156.3 Å <sup>2</sup> |

<sup>a</sup> *d*<sub>calc</sub> and *d*<sub>exp</sub> are the calculated and experimental diffraction spacings, respectively; *hk* is the indexation of the two-dimensional lattice (Miller indices); *a*, *b* and *γ* are the lattice parameters; *S* is the lattice area; Col<sub>r</sub>: 2D rectangular columnar phase.

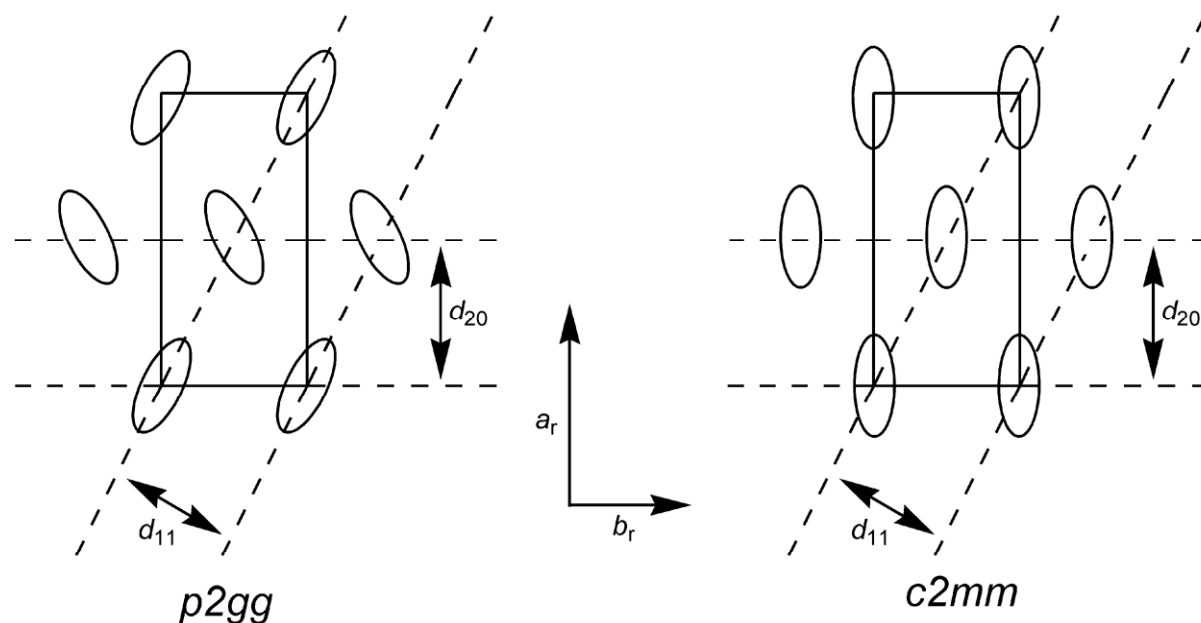

**Fig. S5.** Lateral structures of rectangular columnar phases and their respective plane groups (Hermann-Mauguin nomenclature)<sup>S1</sup>. Schematic representation of the 2D lattices of the two rectangular columnar mesophases: with a *p2gg* plane group (left) and with a *c2mm* plane group (right).<sup>S2</sup> These two arrangements include two columns per lattice and the elementary 3D cell is orthorhombic.

## Solid state NMR

### Instrumentation

All solid state NMR experiments were performed on a Bruker spectrometer with a  $^1\text{H}$  frequency of 700.13 MHz and a  $^{13}\text{C}$  frequency of 176.05 MHz. A Bruker double resonance probe supporting rotors of 2.5 mm outer diameter was used at a spinning frequency of 25 kHz for  $^{13}\text{C}$  cross-polarization (CP) magic angle spinning (MAS) experiments. The RF precession frequencies were set to 100 kHz for both channels. The  $^{13}\text{C}$  CP MAS measurement have been recorded with 2 s recycle delay, 1 ms CP contact time using a variable amplitude contact pulse (80–100%)<sup>S3</sup> and two-pulse phase-modulation (TPPM)  $^1\text{H}$  decoupling during the acquisition.<sup>S4</sup>

At high spinning frequencies, additional heating effects caused by bearing gas friction become significant. The given sample temperature has been corrected for the frictional heating effect following the described procedure.<sup>S5</sup>

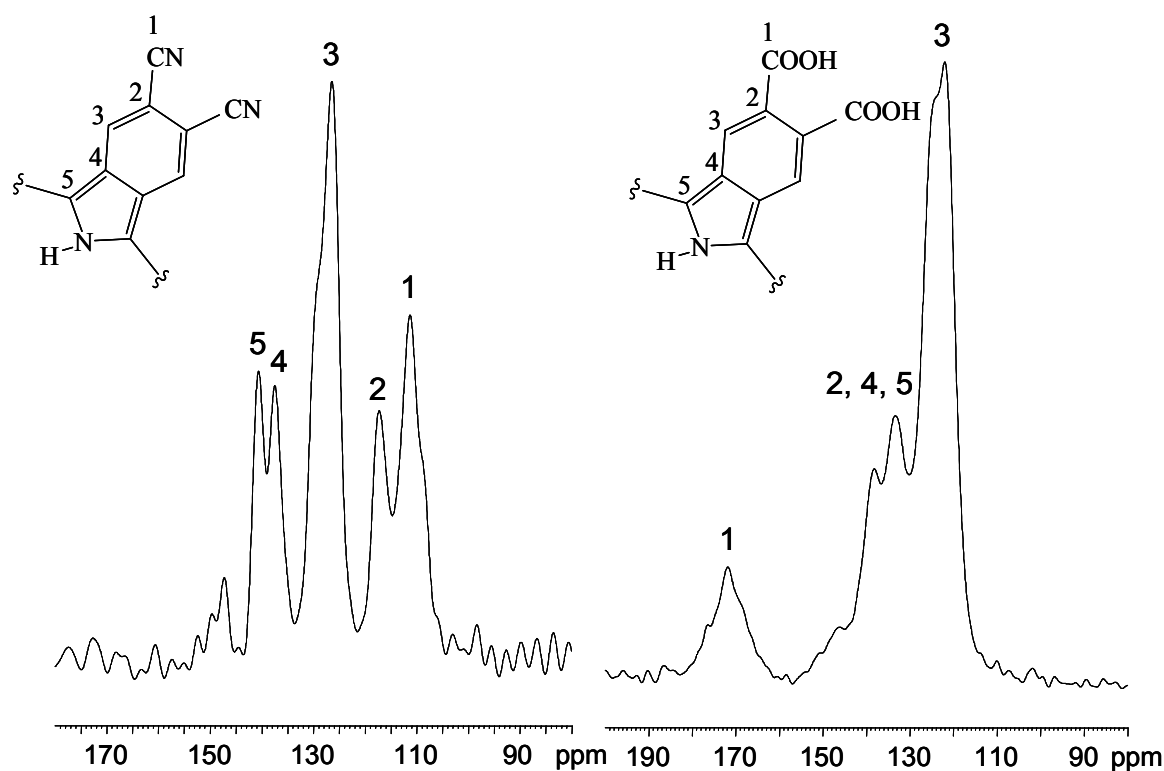

**Fig. S6.**  $^{13}\text{C}$  CP MAS NMR spectra of **2** (left, 3 k transients) and **3** (right, 20 k transients) at 313 K. Due to the unfavorable distribution of the  $^{13}\text{C}$  chemical shifts of the quaternary carbons in the case of compound **3**, the aromatic signals could not unambiguously be assigned from the CP MAS spectrum.

## References

- S1 *International Tables for Crystallography, Vol. A: Space-group symmetry*, ed. T. Hahn, 5<sup>th</sup> Edition, Published for The International Union for Crystallography by Kluwer Academic Publishers Dordrecht/Boston/London, 2002.
- S2 J. W. Goodby, G. W. Gray, *Handbook of Liquid Crystals, Vol. 1: Fundamentals*, eds. D. Demus, J. Goodby, G. W. Gray, H-W. Spiess, V. Vill, Wiley-VCH Publishers, Weinheim New York, **1998**, p. 668.
- S3 G. Metz, X. Wu, S. O. Smith, *J. Magn. Res.* **1994**, *110*, 219.
- S4 A. E. Bennet, C. M. Rienstra, M. Auger, K. V. Lakshmi, R. G. Griffin, *J. Chem. Phys.* **1995**, *103*, 6951.
- S5 B. Langer, I. Schell, H. W. Spiess, A.-R. Grimmer, *J. Magn. Res.* **1999**, *138*, 182.
